# Supplementary material for: Identification of antipsychotic drug fluspirilene as a potential anti-glioma stem cell drug
Source: PubMed Central journal article supplement (PMC5762355; doi:10.18632/oncotarget.22904), 2017-12-04
Supplement: oncotarget-08-111728-s001.pdf [file oncotarget-08-111728-s001.pdf]

## Identification of antipsychotic drug fluspirilene as a potential anti-glioma stem cell drug

### SUPPLEMENTARY MATERIALS

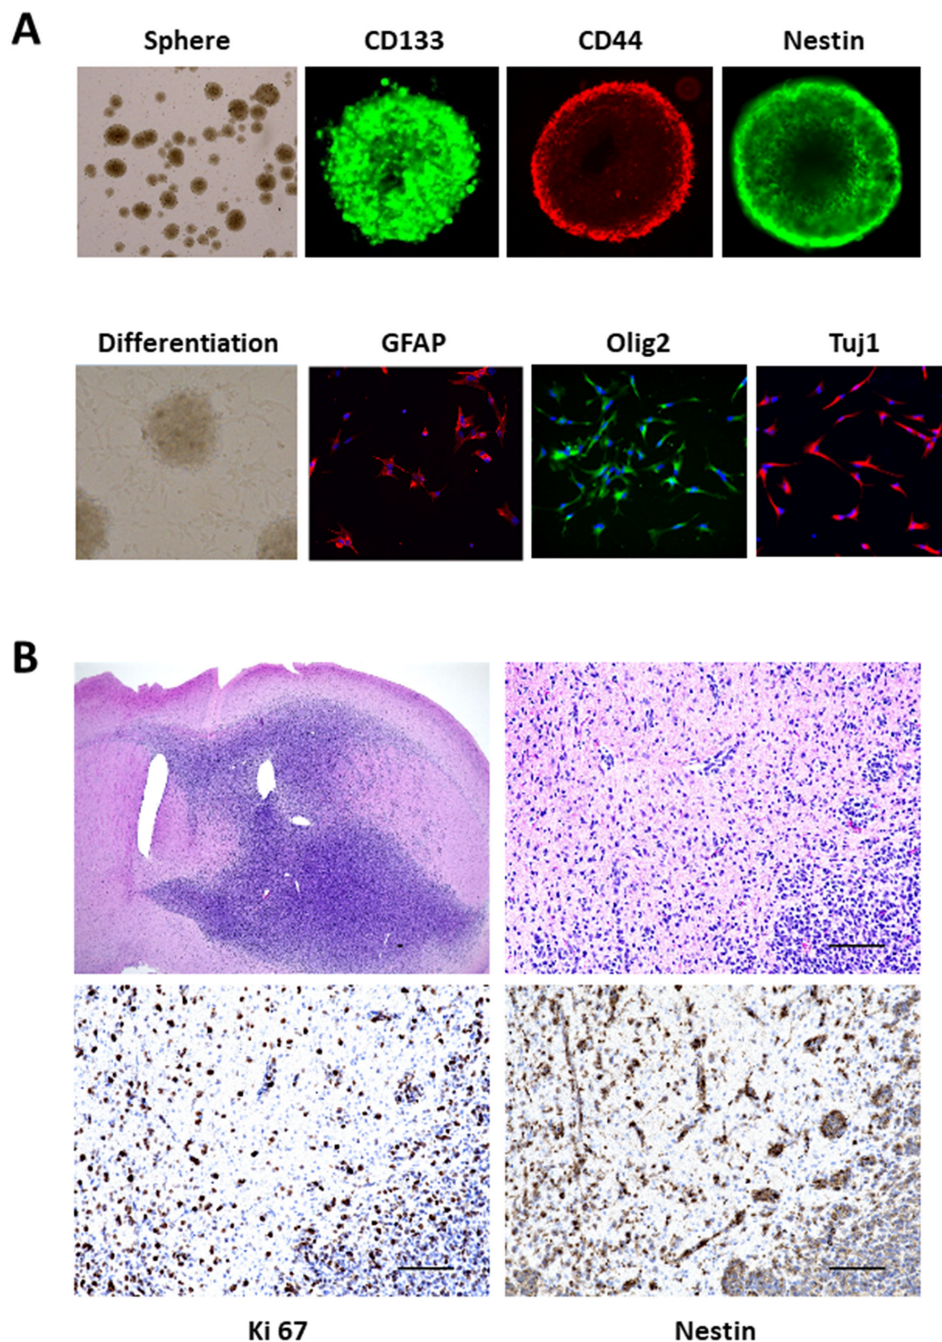

**Supplementary Figure 1: Stemness, differentiation, and tumor-initiating potential of KGS01.** (A) Tumorspheres derived from a GBM surgical specimen (KGS01) were positively stained for CD133, CD44, and nestin, which are the characteristic markers of mesenchymal-type stem cells. Magnification,  $\times 400$ . Tumorspheres differentiated into GFAP- and Olig2-positive astrocyte-like cells and Tuj1-positive neuron-like cells in DMEM supplemented with 10% FBS. Magnification,  $\times 200$ . (B) KGS01 cells ( $5 \times 10^4$ ) were transplanted into the mouse brain, and a brain tumor histologically recapitulating the features of original GBM developed 60 days later. Tumor cells were positive for nestin and showed a high antigen Ki-67 staining index. Scale bar = 100  $\mu\text{m}$ .

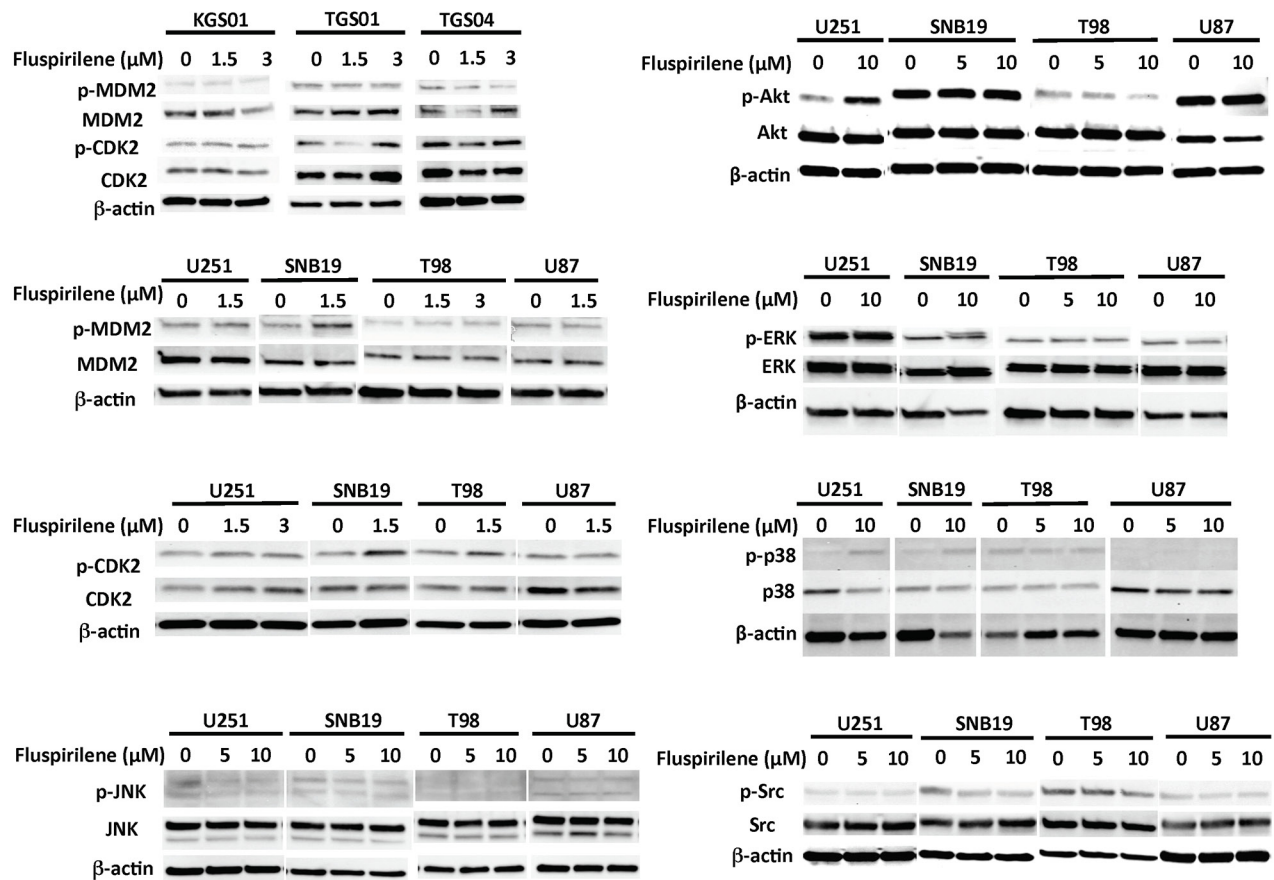

**Supplementary Figure 2: Western blot analysis of pathways targeted by fluspirilene.** Fluspirilene down-regulated phosphorylation or expression level of MDM2, CDK2, Akt, ERK1/2, p38, JNK and Src in some GSCs or GBM cells.

**Supplementary Table 1: Source and working dilutions of the primary antibodies used for Western blotting, immunohistochemical staining, and immunofluorescence**

| Antibody                                       | MW (kDa) | Source | Working dilution                     | Company           |
|------------------------------------------------|----------|--------|--------------------------------------|-------------------|
| Akt                                            | 60       | Rabbit | 1:1000 (WB)                          | Cell Signaling    |
| p-Akt (S <sup>473</sup> )                      | 60       | Rabbit | 1:1000 (WB)                          | Cell Signaling    |
| β-actin                                        | 42       | Mouse  | 1:5,000 (WB)                         | WAKO              |
| CD44                                           | 29-37    | Mouse  | 1:400 (IF)                           | DAKO              |
| CD133                                          | 97       | Mouse  | 1:400 (IF)                           | R&D Systems       |
| CDK2                                           | 33       | Rabbit | 1:1000 (WB)                          | Cell Signaling    |
| p-CDK2 (T <sup>160</sup> )                     | 33       | Rabbit | 1:1000 (WB)                          | Cell Signaling    |
| ERK1/2                                         | 44, 42   | Rabbit | 1:1000 (WB)                          | Cell Signaling    |
| p-ERK1/2 (T <sup>202</sup> /Y <sup>204</sup> ) | 44, 42   | Rabbit | 1:1000 (WB)                          | Cell Signaling    |
| GFAP                                           | 55       | Rabbit | 1:600 (IF)                           | DAKO              |
| JNK                                            | 46, 54   | Rabbit | 1:1000 (WB)                          | Cell Signaling    |
| p-JNK (T <sup>183</sup> /Y <sup>185</sup> )    | 46, 54   | Rabbit | 1:500 (WB)                           | Cell Signaling    |
| Ki-67                                          | 359      | Rabbit | 1:800 (IHC)                          | Thermo Scientific |
| MDM2                                           | 90       | Rabbit | 1:1000 (WB)                          | NOVUS             |
| p-MDM2 (S <sup>166</sup> )                     | 90       | Rabbit | 1:500 (WB)                           | Cell Signaling    |
| Nestin                                         | 260      | Mouse  | 1:400 (IHC), 1:200 (IF)              | BD Biosciences    |
| Olig2                                          | 32       | Rabbit | 1:500 (IF)                           | IBL               |
| p38                                            | 40       | Rabbit | 1:1000 (WB)                          | Cell Signaling    |
| p-p38 (T <sup>180</sup> /Y <sup>182</sup> )    | 43       | Rabbit | 1:1000 (WB)                          | Cell Signaling    |
| SOX2                                           | 34       | Rabbit | 1:2000 (WB)                          | Gene Tex          |
| Src                                            | 60       | Rabbit | 1:1000 (WB)                          | Cell Signaling    |
| p-Src (Y <sup>416</sup> )                      | 60       | Rabbit | 1:1000 (WB)                          | Cell Signaling    |
| STAT3                                          | 80       | Mouse  | 1:2,000 (WB), 1:500 (IHC), 1:400(IF) | Cell Signaling    |
| p-STAT3 (S <sup>727</sup> )                    | 80       | Rabbit | 1:500 (WB), 1:200 (IHC)              | Cell Signaling    |
| Tuj1                                           | 55       | Mouse  | 1:200 (IF)                           | R&D system        |

Abbreviations: CDK2, cyclin-dependent kinase 2; ERK1/2, extracellular signal-regulated kinase 1/2; GFAP, glial fibrillary acidic protein; IF, immunofluorescence; IHC, immunohistochemistry; JNK, c-Jun N-terminal kinase; MDM2, murine double minute 2; MW, molecular weight; SOX2, SRY (sex determining region Y)-box 2; STAT3, signal transducer and activator of transcription 3; WB, Western blotting
